# Supplementary material for: pH- and NIR light responsive nanocarriers for combination treatment of chemotherapy and photodynamic therapy
Source: Royal Society of Chemistry journal article supplement (doi:10.1039/c5bm00328h), 2015-12-01
Supplement: c5bm00328h1.pdf [file c5bm00328h1.pdf]

## Supporting Information

### **pH- and NIR light responsive nanocarriers for combination treatment of chemotherapy and photodynamic therapy**

Sheng Wang,<sup>a</sup> Weitao Yang,<sup>a</sup> Jing Cui,<sup>b</sup> Xue Li,<sup>b</sup> Yan Dou,<sup>a</sup> Lin Su,<sup>a</sup>

Jin Chang,<sup>\*ad</sup> Hanjie Wang,<sup>\*ad</sup> Xiaodong Li<sup>\*b</sup> and Bingbo Zhang<sup>c</sup>

<sup>a</sup> School of Life Sciences, School of Materials Science and Engineering, Tianjin University, Tianjin 300072, PR China

<sup>b</sup> The second hospital of Tianjin Medical University, Tianjin 300211, PR China.

<sup>c</sup> Shanghai East Hospital, The Institute for Biomedical Engineering & Nano Science, Tongji University School of Medicine, Shanghai 200092, PR China

<sup>d</sup> Tianjin Engineering Center of Micro-Nano Biomaterials and Detection-Treatment Technology, Collaborative Innovation Center of Chemical Science and Engineering (Tianjin), Tianjin 300072, PR China

\*Corresponding authors. E-mail: jinchang@tju.edu.cn (Jin Chang), wanghj@tju.edu.cn (Hanjie Wang), lixiaodonglxd@163.com (Xiaodong Li)

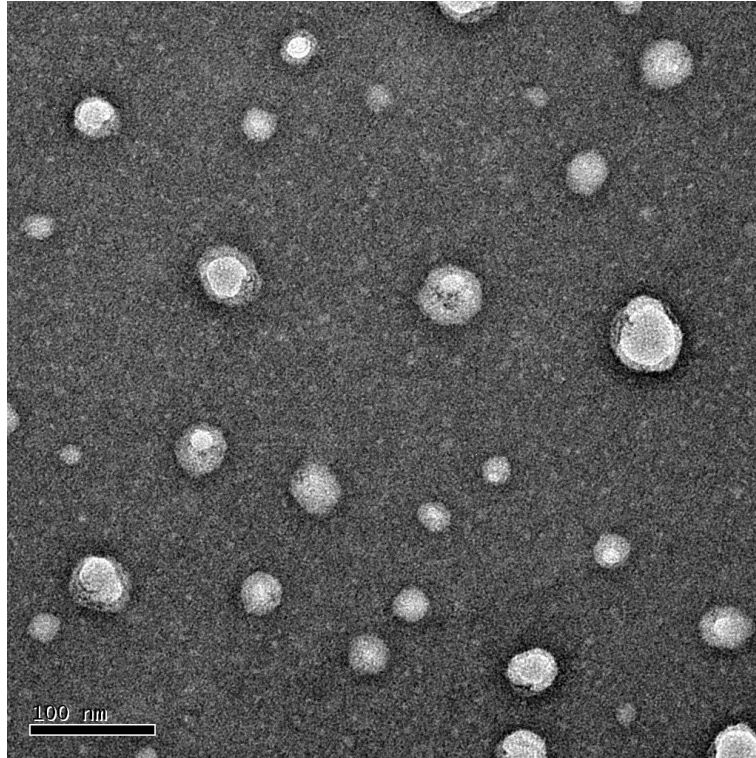

**Fig. S1** TEM image of the PLVs.

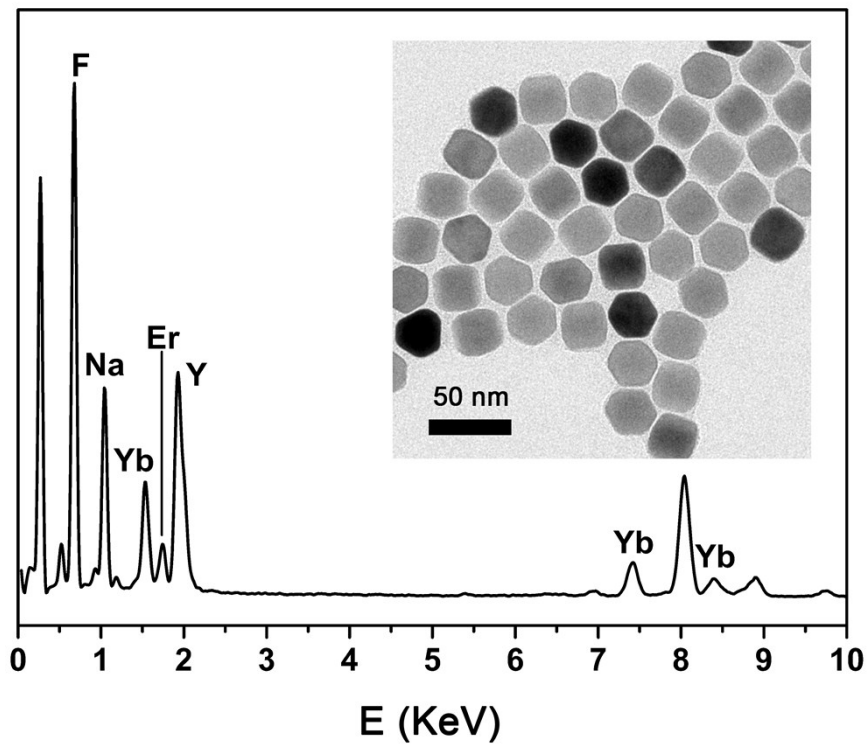

**Fig. S2** EDX spectrum and TEM image (inset) of the UCNs.

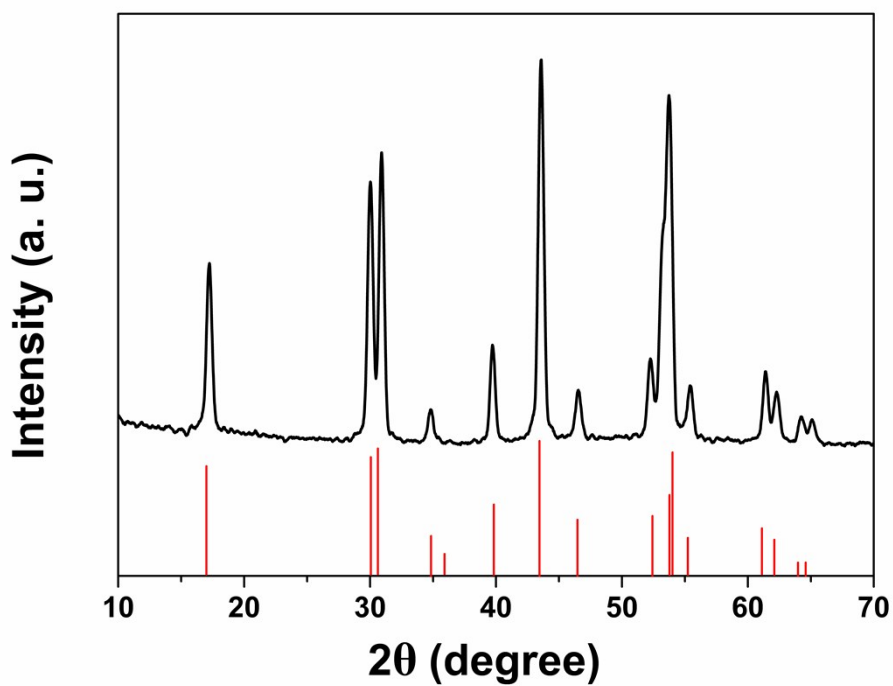

**Fig. S3** X-ray diffraction pattern of the UCNs. Red lines are standard pattern of NaYF<sub>4</sub> (JCPDS card 16-0334).

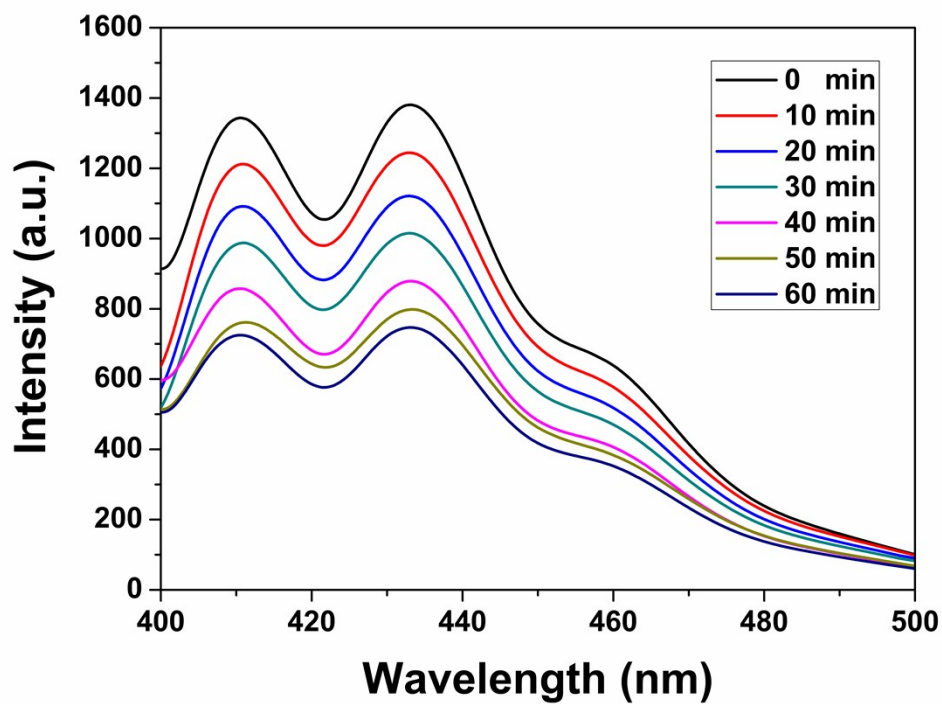

**Fig. S4** Fluorescence emission spectra of ABDA incubated with MC540-UPLVs under 980 nm NIR light excitation.

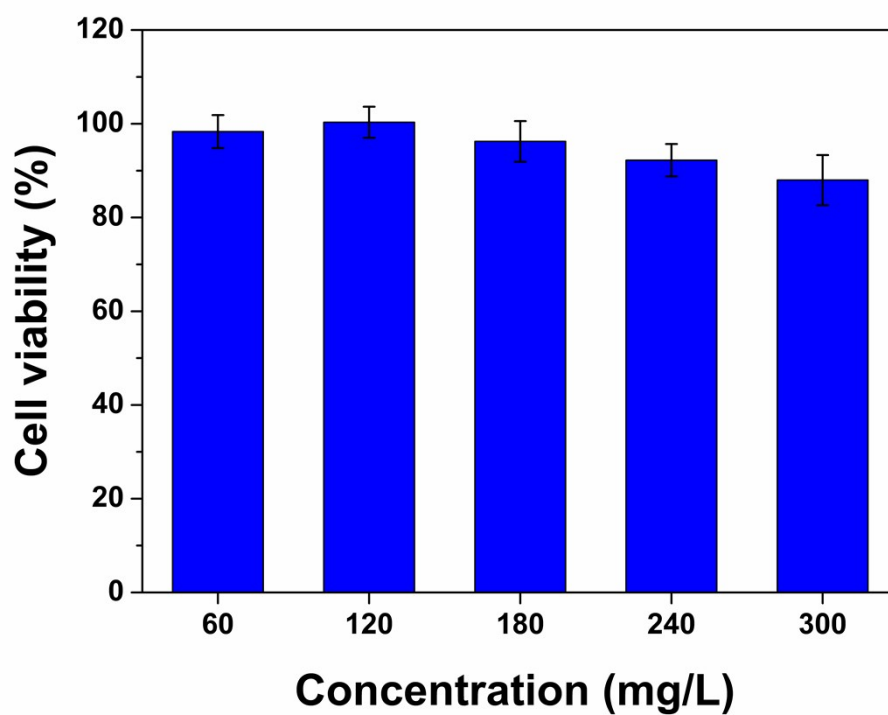

Fig. S5 Cytotoxicity of UPLVs against HeLa cells.

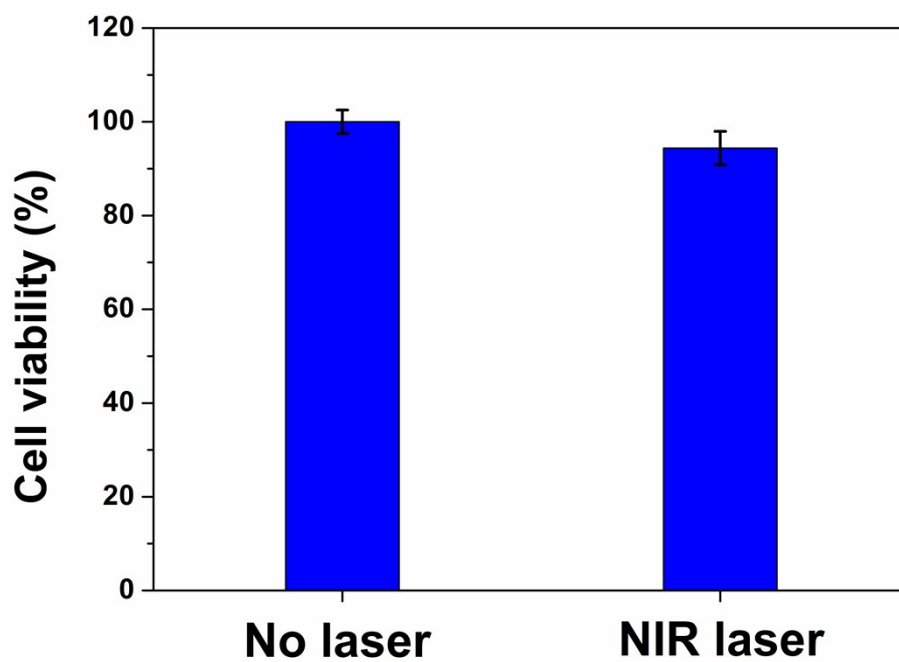

Fig. S6 The effect of NIR laser alone on the cell viability.

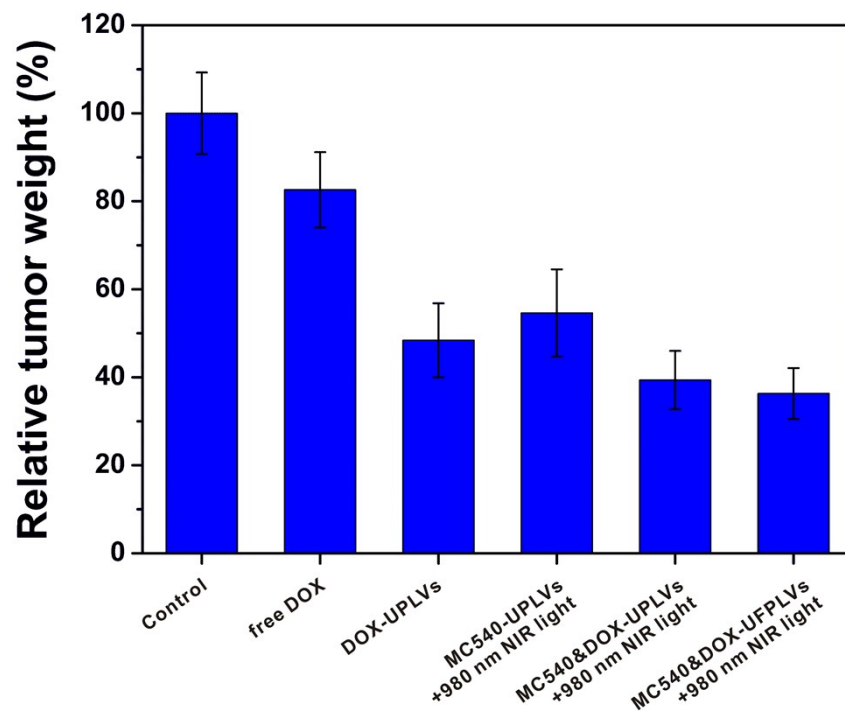

**Fig. S7** The final tumor weight of mice in different treatment groups.
